# Supplementary material for: Network analysis of genomic alteration profiles reveals co-altered functional modules and driver genes for glioblastoma
Source: Royal Society of Chemistry journal article supplement (doi:10.1039/c2mb25528f), 2013-01-07
Supplement: c2mb25528f.pdf [file c2mb25528f.pdf]

## **Supplementary material**

**for**

### **Network Analysis of Genomic Alteration Profiles Reveals Co-altered Functional Modules and Driver Genes in Glioblastoma**

Yunyan Gu<sup>1\*</sup>, Hongwei Wang<sup>1</sup>, Yao Qin<sup>1</sup>, Yujing Zhang<sup>1</sup>, Wenyuan Zhao<sup>1</sup>, Lishuang Qi<sup>1</sup>, Yuannv Zhang<sup>1</sup>, Chenguang Wang<sup>1</sup>, Zheng Guo<sup>1,2\*</sup>

<sup>1</sup> College of Bioinformatics Science and Technology, Harbin Medical University,  
Harbin 150086, China

<sup>2</sup> Bioinformatics Center, Fujian Medical University, Fuzhou, 350004, China

\* Corresponding author

Email: [guoz@ems.hrbmu.edu.cn](mailto:guoz@ems.hrbmu.edu.cn) or [guyunyan@ems.hrbmu.edu.cn](mailto:guyunyan@ems.hrbmu.edu.cn)

Phone: (86 451) 8661-5933

Fax: (86 451) 8666-9617

## **Table of Contents**

A. Supplementary Methods (pg 3-4)

B. Supplementary Figures (pg 5-11)

C. Supplementary Tables (pg 12-19)

## A. Supplementary Methods

### The pseudo codes for searching co-altered module pair

Input: (1)  $G(V, E)$ , where  $G$  is the connected sub-network,  $V$  is the set of genes and  $E$  is the set of edges in the network;  
(2) Alteration profiles;

Output:  $R=(M_1, M_2, \dots, M_N)$ ,  $N$  module pairs,  $M_i(G_1, G_2)$ ,  $i=1\dots N$ , will to be discovered and returned.

$N$  is also the number of all seed pairs.

$S$  is the co-alteration score of the module pair.

1:  $R=\phi$ .  $S=0$ .  $N'=1$ .

2:  $M(G_1, G_2)$  is the module pair that we will discover.

3: **repeat**

4: Taking each pair of altered genes as a seed pair, also a module pair  $M(G_1, G_2)$ ,  $G_1=\{i\}$ ,  $G_2=\{j\}$ .  $S=S_{\text{seed}}$ .

5: **repeat**

6:  $\quad\quad\quad$  #add one altered gene in module pair#

7: Find all edges  $E(G_1, k_p)=1$  or  $E(G_2, k_q)=1$  from  $E$ .  $p, q=1, \dots, n$ . we regard the nodes  $k_1, \dots, k_p, \dots, k_q, \dots, k_n$  as the direct interaction neighbors with  $G_1$  or  $G_2$ .

8:  $V'=\{v \mid v \in k_1, \dots, k_p, \dots, k_q, \dots, k_n, \text{ and } E(G_1, v)=1 \text{ or } E(G_2, v)=1, v \notin G_1 \cup G_2\}$

9: **if**  $V'$  is empty **then**

10:  $\quad\quad\quad S$  unchanged

11: **Else**

12: **while** there is at least one interaction neighbor with  $G_1$  or  $G_2$  **do**

13: **for all**  $v \in V'$  **do**

14:  $\quad\quad\quad$  Calculate  $S(v)=\max(S(G_1 \cup v, G_2) \mid E(G_1, v)=1, S(G_1, G_2 \cup v) \mid E(G_2, v)=1)$

15:  $\quad\quad\quad$  **if**  $S(v) > S$  **then**

16:  $\quad\quad\quad$  Set  $S = S(v)$ , added  $v$  to  $G_1 \mid E(G_1, v)=1$  or added  $v$  to  $G_2 \mid E(G_2, v)=1$ ,

17:  $\quad\quad\quad$  **end for**

18: **end while**

19:  $\quad\quad\quad$  #delete one altered gene from module pair#

20: Find all nodes  $x_1, \dots, x_p, \dots, x_n$  with only one interaction neighbor in the current module pair  $M(G_1, G_2)$ . And, they are not the current seeds and not the new added node.

21:  $X'=\{x \mid x \in x_1, \dots, x_p, \dots, x_n, x \text{ is not the current seed and not the new added node}\}$

22: **if**  $X'$  is empty **then**

23:  $\quad\quad\quad S$  unchanged

24: **else**

25: **while** there is at least one node that not the current seed and not the

```

        new added node in  $M(G_1, G_2)$  do
26:    for all  $x \in X'$  do
27:        Calculate  $S(x) = \max(S(G_1 - x, G_2) \mid x \in G_1, S(G_1, G_2 - x) \mid x \in G_2)$ 
28:        if  $S(x) > S$  then Set  $S = S(x)$ ,  $G_1 = G_1 - x \mid x \in G_1$  or  $G_2 = G_2 - x \mid x \in G_2$ 
29:    end for
30:    end while
31: until  $S$  no longer increased
32:    add  $M(G_1, G_2)$  into  $R$ 
33:     $N' = N' + 1$ 
34: until  $N' > N$ 
    
```

B. Supplementary Figures

Supplementary Figure 1- Top mutual exclusive module pair

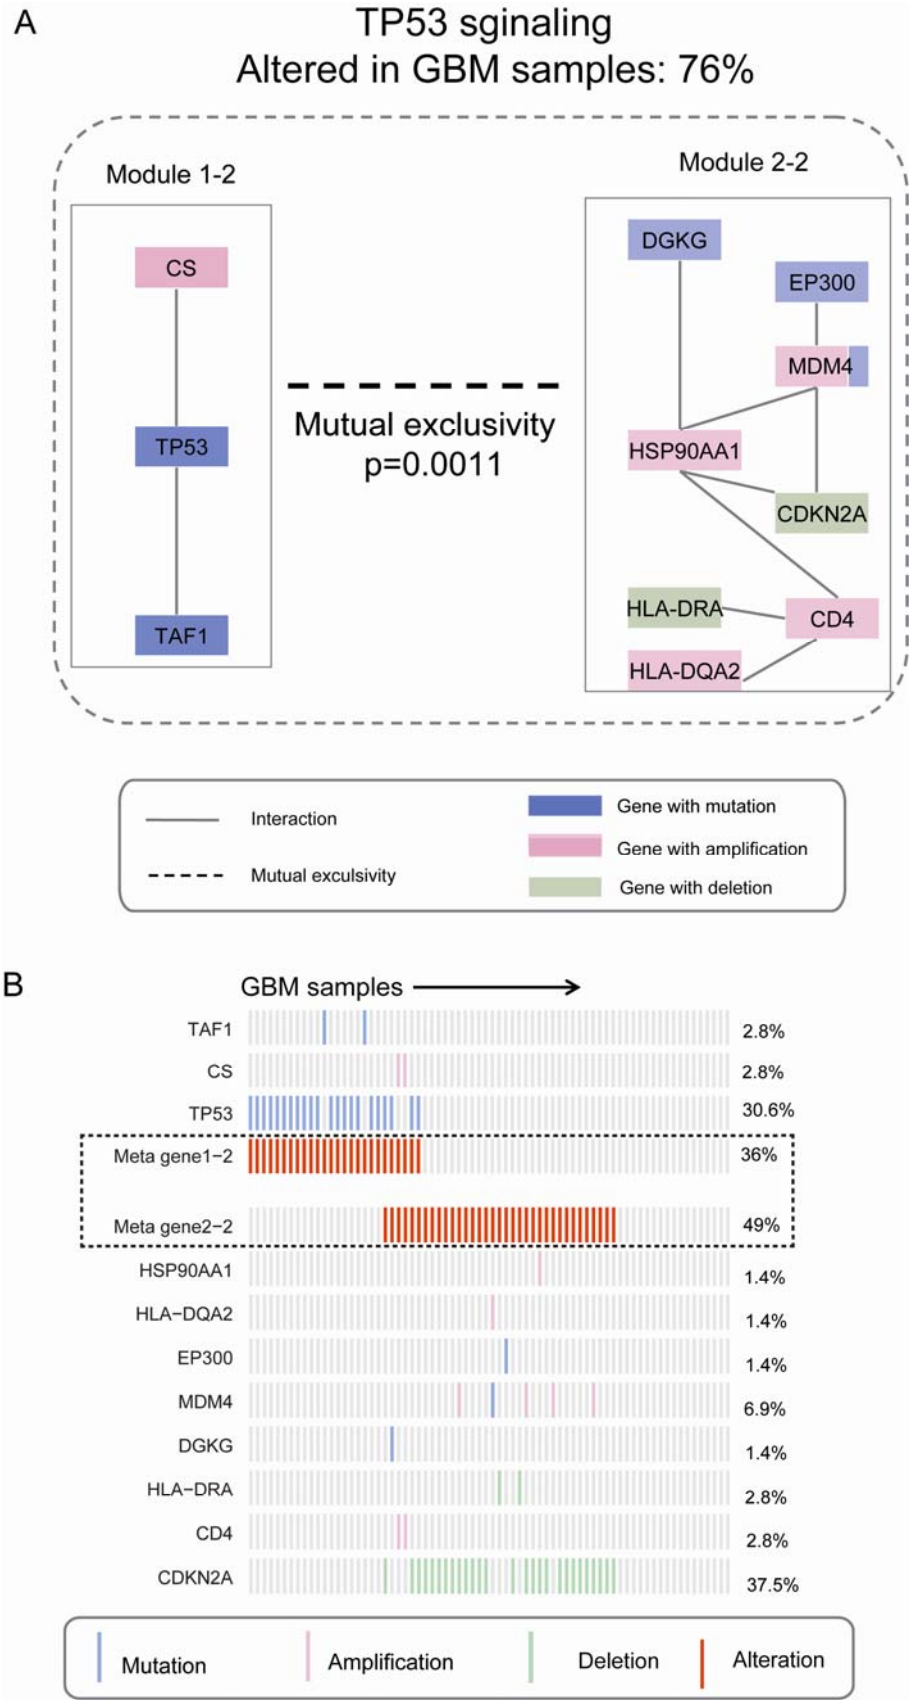

Supplementary Figure 2- Co-altered module pair 3

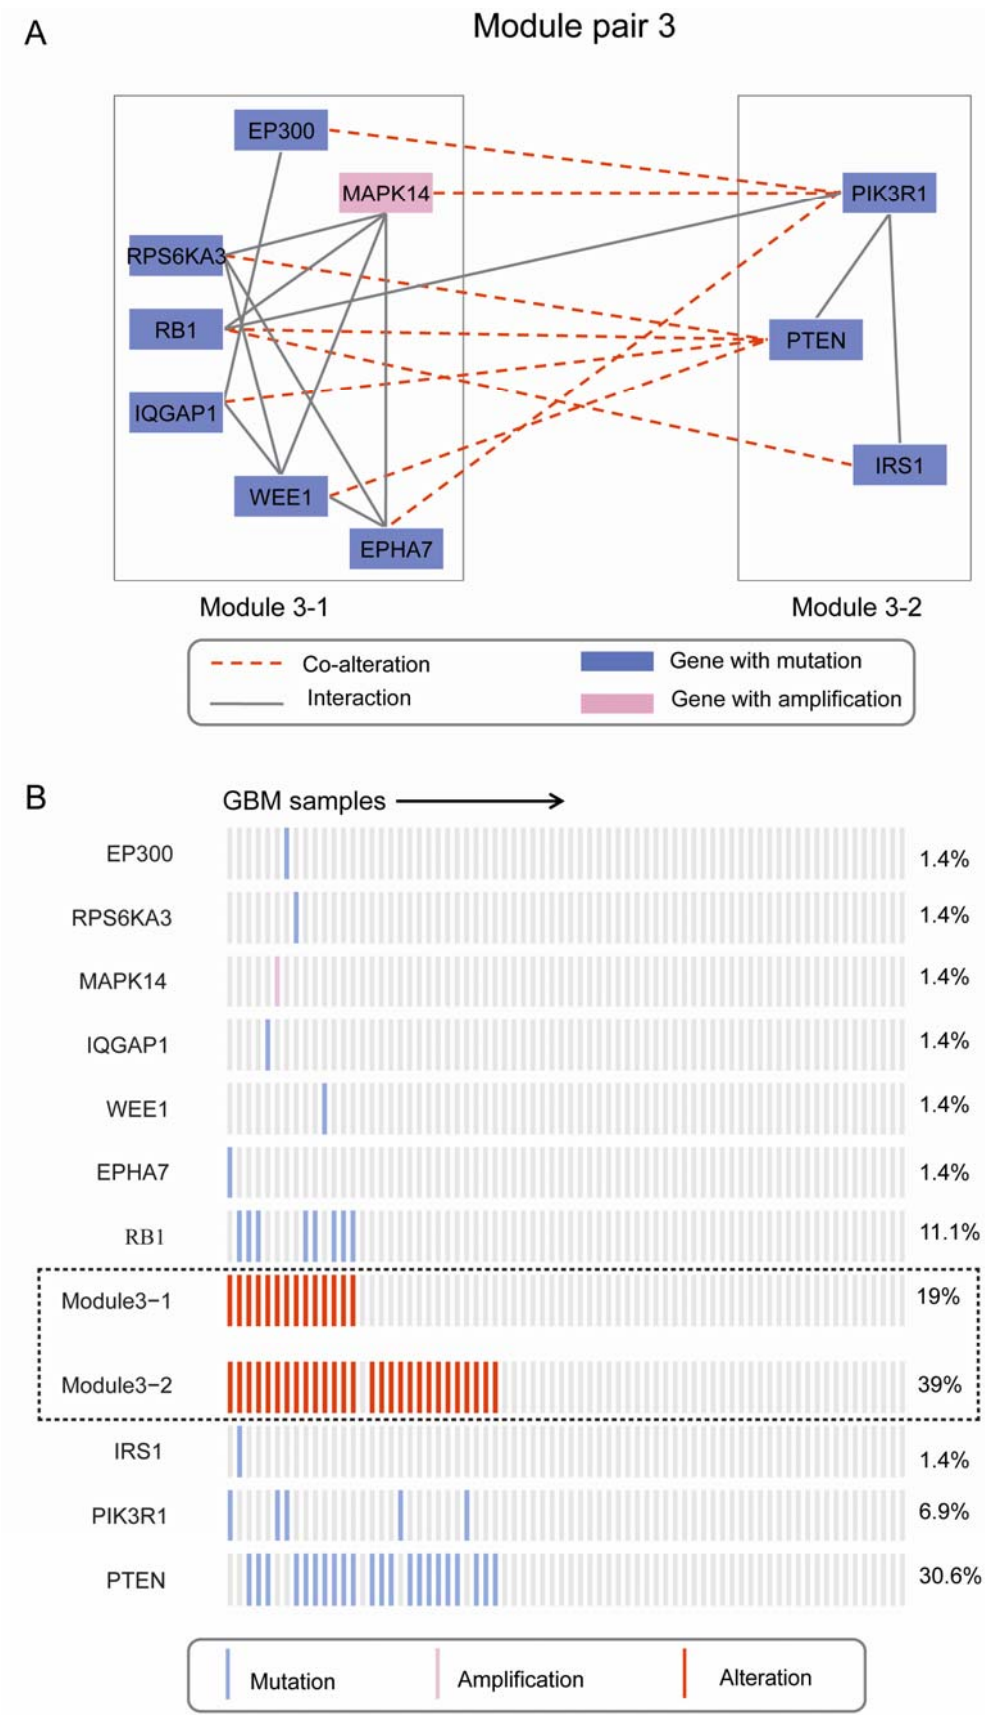

Supplementary Figure 3- Co-altered module pair 4

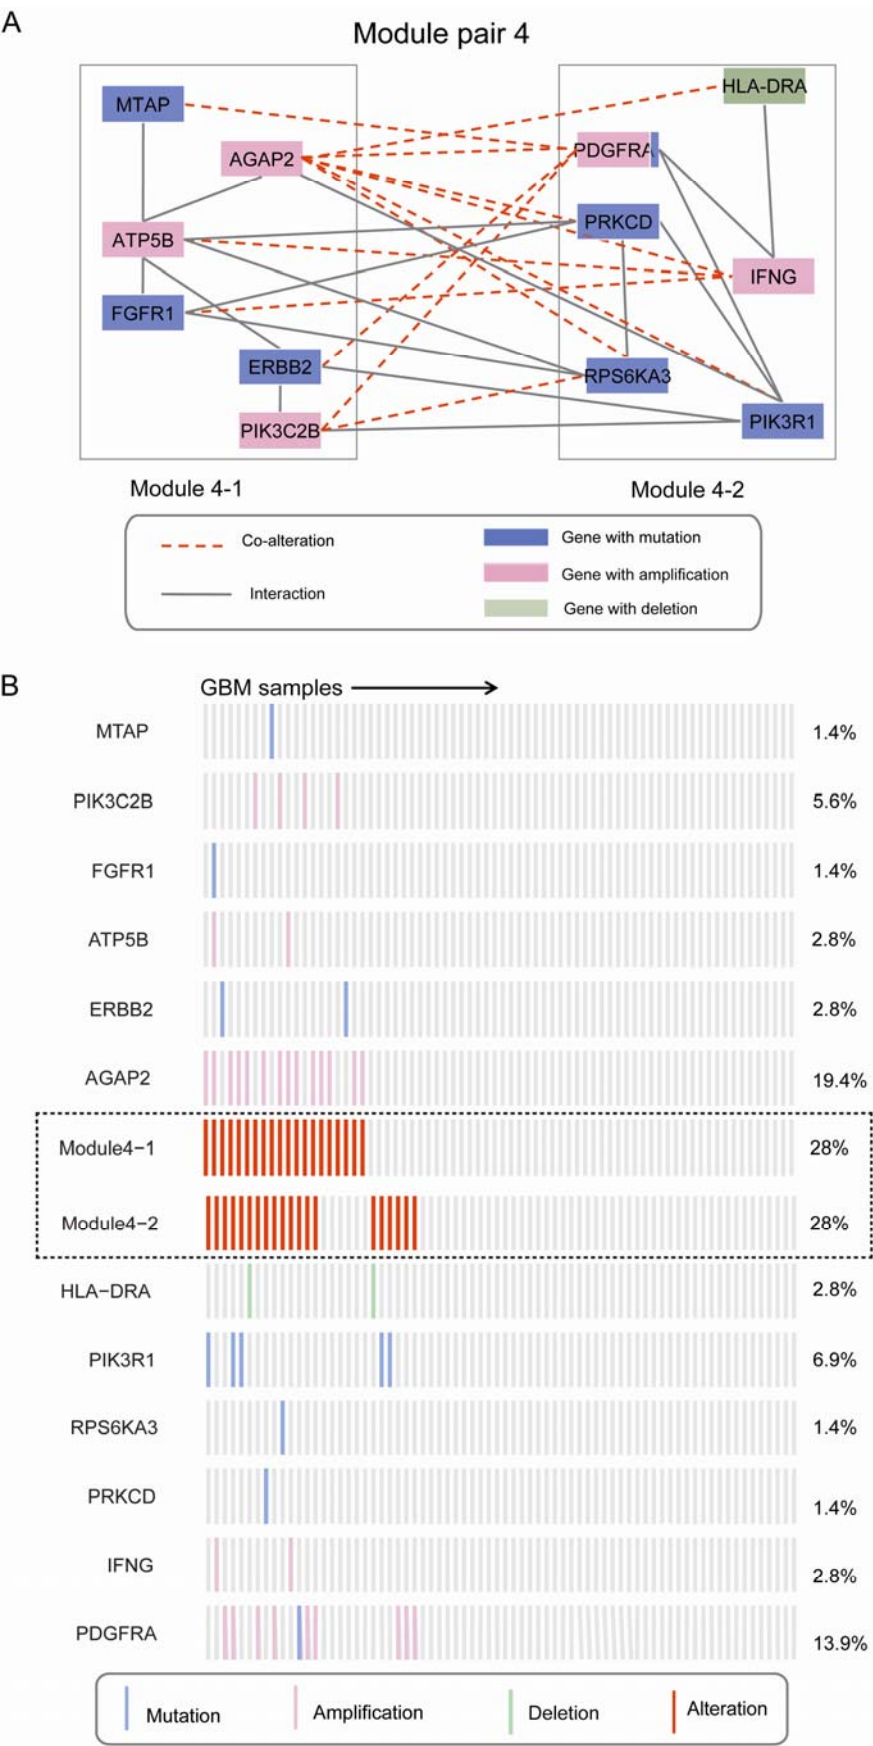

Supplementary Figure 4- Co-altered module pair 5

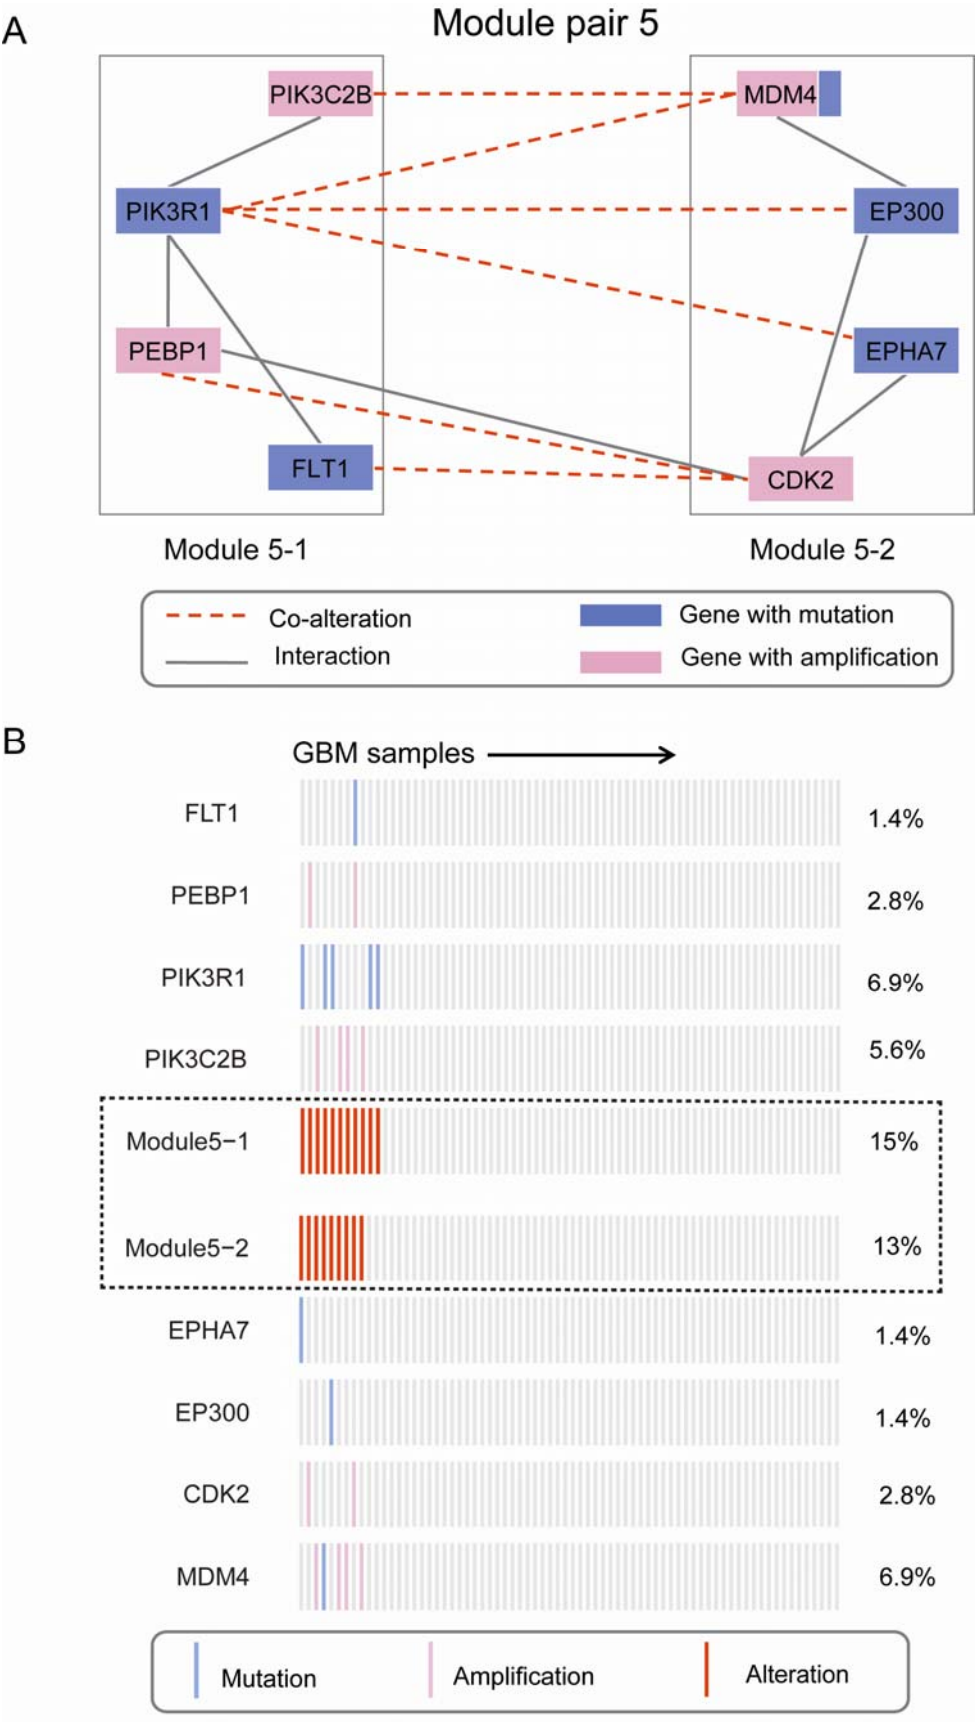



Supplementary Figure 5- Co-altered module pair 6

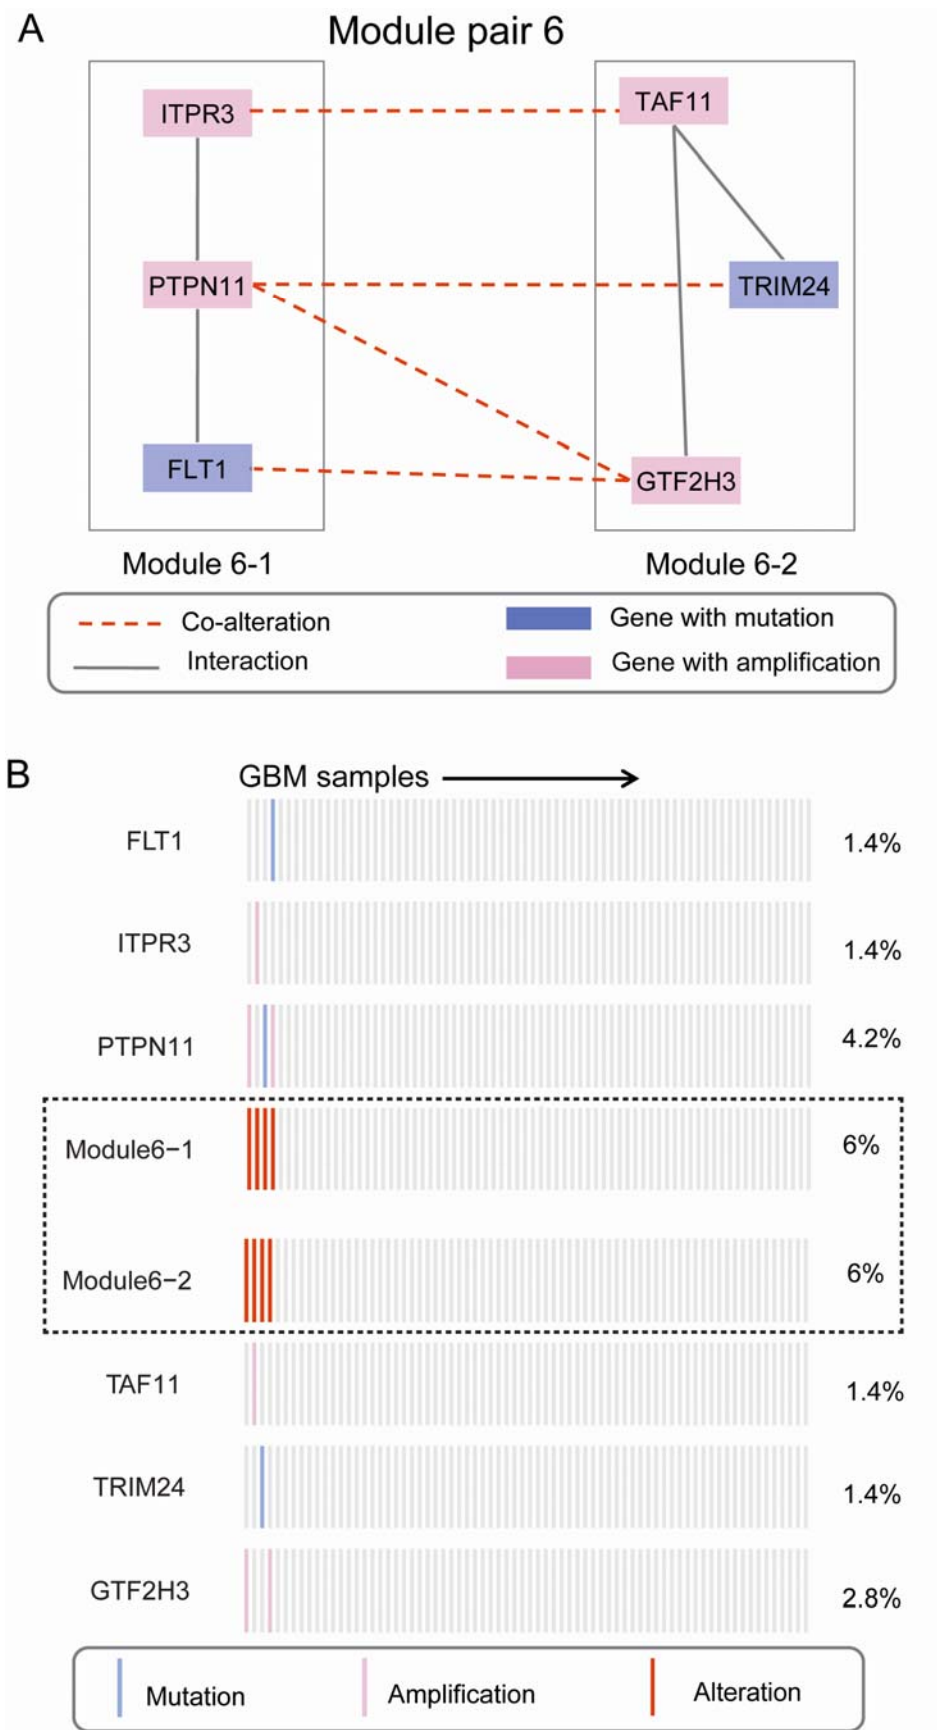

Supplementary Figure 6- Co-altered module pair 7

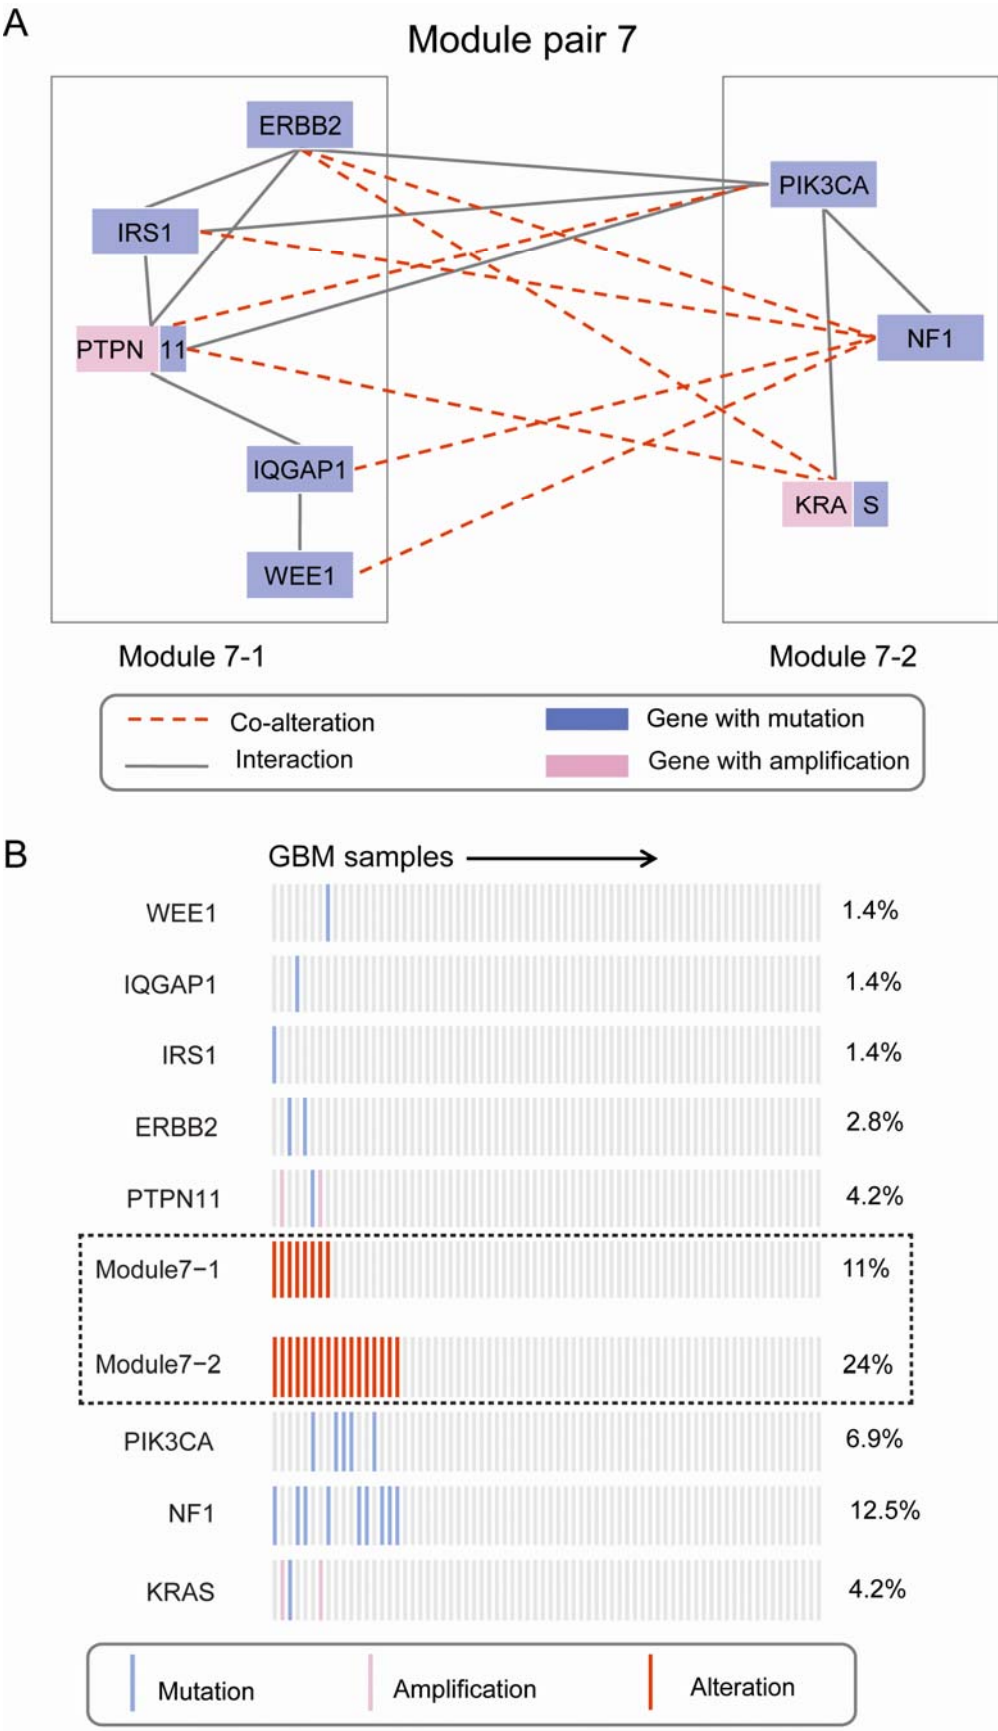

**Supplementary Figure 7- Schematic diagram of the redundant and aggravating models for co-altered modules**

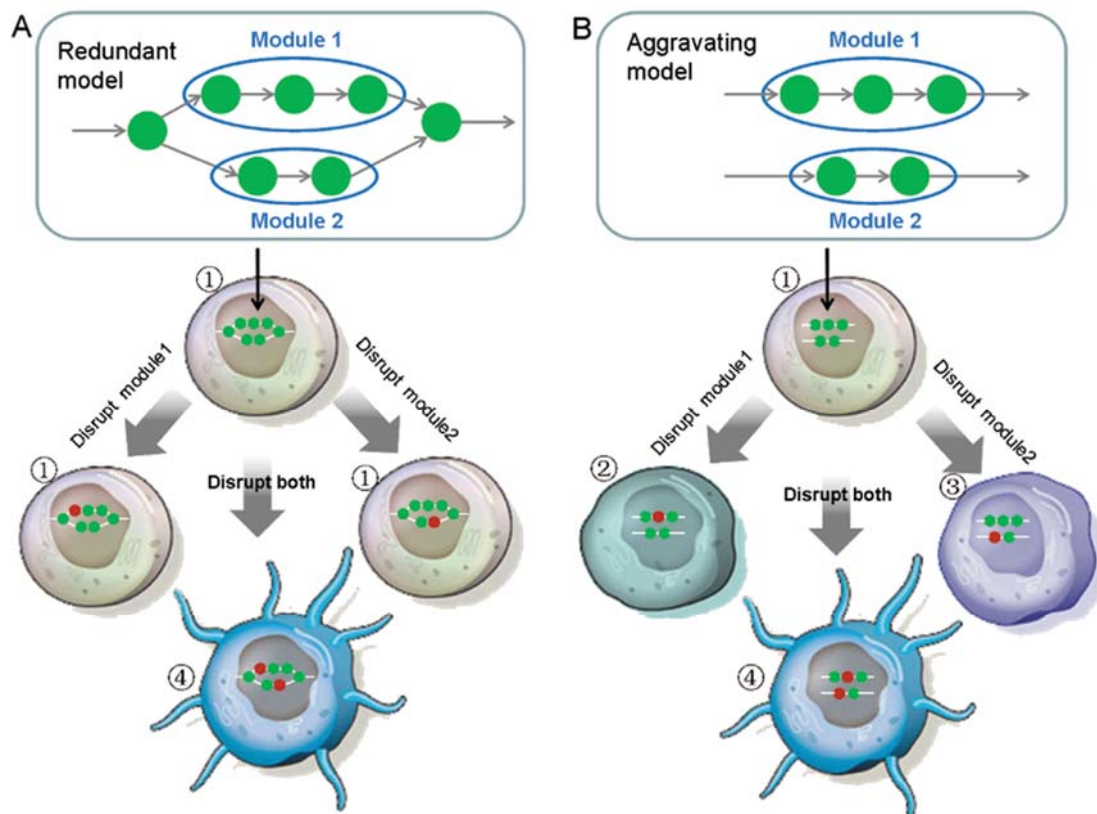

Supplementary Figure 7– (A) The redundant model for co-altered modules. Alterations in modules 1 or 2 alone could not transform normal cells into cancer cells; cells become cancerous only when both of the modules are disrupted. (B) The aggravating model for co-altered modules. Alterations in modules 1 and 2, which individually have limited effects on promoting cancer, cooperate to transform normal cells into cancer cells. ① denotes normal cells. ② and ③ denote the cells with characteristics of cancer cells. ④ denotes the cancer cells. The red and green nodes within the modules represent genes with and without alterations, respectively.

C. Supplementary Tables

Supplementary Table 1- The co-altered module pairs

| ID | Module ID  | Entrez Gene ID | Gene Symbol <sup>1</sup> | Pathway                      | #N <sup>2</sup> | #M <sup>3</sup> | #S <sup>4</sup> | P-value  |
|----|------------|----------------|--------------------------|------------------------------|-----------------|-----------------|-----------------|----------|
| 1  | Module 1-1 | 5925           | RB1                      | RB<br>signaling<br>pathway   | 8               | 13              | 12              | 6.41E-06 |
|    |            | 1027           | CDKN1B                   |                              | 2               |                 |                 |          |
|    |            | 8826           | IQGAP1                   |                              | 1               |                 |                 |          |
|    |            | 7465           | WEE1                     |                              | 1               |                 |                 |          |
|    |            | 2045           | EPHA7                    |                              | 1               |                 |                 |          |
|    | Module 1-2 | 7157           | TP53                     | TP53<br>signaling<br>pathway | 22              | 26              |                 |          |
|    |            | 1431           | CS                       |                              | 2               |                 |                 |          |
|    |            | 6872           | TAF1                     |                              | 2               |                 |                 |          |
| 2  | Module 2-1 | 1956           | EGFR                     | RTK<br>signaling<br>pathway  | 34              | 41              | 31              | 8.57E-08 |
|    |            | 1432           | MAPK14                   |                              | 1               |                 |                 |          |
|    |            | 506            | ATP5B                    |                              | 2               |                 |                 |          |
|    |            | 5287           | PIK3C2B                  |                              | 4               |                 |                 |          |
|    |            | 5290           | PIK3CA                   |                              | 5               |                 |                 |          |
|    | Module 2-2 | 1029           | CDKN2A                   | TP53<br>signaling<br>pathway | 27              | 35              |                 |          |
|    |            | 920            | CD4                      |                              | 2               |                 |                 |          |
|    |            | 3122           | HLA-DRA                  |                              | 2               |                 |                 |          |
|    |            | 1608           | DGKG                     |                              | 1               |                 |                 |          |
|    |            | 4194           | MDM4                     |                              | 5               |                 |                 |          |
|    |            | 2033           | EP300                    |                              | 1               |                 |                 |          |
|    |            | 3118           | HLA-DQA2                 |                              | 1               |                 |                 |          |
|    |            | 3320           | HSP90AA1                 |                              | 1               |                 |                 |          |
| 3  | Module 3-1 | 5925           | RB1                      | RB<br>signaling<br>pathway   | 8               | 14              | 14              | 1.34E-07 |
|    |            | 2045           | EPHA7                    |                              | 1               |                 |                 |          |
|    |            | 7465           | WEE1                     |                              | 1               |                 |                 |          |
|    |            | 8826           | IQGAP1                   |                              | 1               |                 |                 |          |
|    |            | 1432           | MAPK14                   |                              | 1               |                 |                 |          |
|    |            | 6197           | RPS6KA3                  |                              | 1               |                 |                 |          |
|    |            | 2033           | EP300                    |                              | 1               |                 |                 |          |
|    | Module 3-2 | 5728           | PTEN                     | RTK<br>signaling<br>pathway  | 22              | 28              |                 |          |
|    |            | 5295           | PIK3R1                   |                              | 5               |                 |                 |          |
|    |            | 3667           | IRS1                     |                              | 1               |                 |                 |          |
| 4  | Module 4-1 | 116986         | AGAP2                    | RTK<br>signaling<br>pathway  | 14              | 20              | 14              | 2.66E-06 |
|    |            | 2064           | ERBB2                    |                              | 2               |                 |                 |          |
|    |            | 506            | ATP5B                    |                              | 2               |                 |                 |          |
|    |            | 2260           | FGFR1                    |                              | 1               |                 |                 |          |
|    |            | 5287           | PIK3C2B                  |                              | 4               |                 |                 |          |
|    |            | 4507           | MTAP                     |                              | 1               |                 |                 |          |
|    | Module 4-2 | 5156           | PDGFRA                   | RTK<br>signaling             | 10              | 20              |                 |          |
|    |            | 3458           | IFNG                     |                              | 2               |                 |                 |          |

|   |            |      |         |                              |   |    |   |          |
|---|------------|------|---------|------------------------------|---|----|---|----------|
|   |            | 5580 | PRKCD   | pathway                      | 1 |    |   |          |
|   |            | 6197 | RPS6KA3 |                              | 1 |    |   |          |
|   |            | 5295 | PIK3R1  |                              | 5 |    |   |          |
|   |            | 3122 | HLA-DRA |                              | 2 |    |   |          |
| 5 | Module 5-1 | 5287 | PIK3C2B | RTK<br>signaling<br>pathway  | 4 | 11 | 9 | 6.46E-10 |
|   |            | 5295 | PIK3R1  |                              | 5 |    |   |          |
|   |            | 5037 | PEBP1   |                              | 2 |    |   |          |
|   |            | 2321 | FLT1    |                              | 1 |    |   |          |
|   | Module 5-2 | 4194 | MDM4    | TP53<br>signaling<br>pathway | 5 | 9  |   |          |
|   |            | 1017 | CDK2    |                              | 2 |    |   |          |
|   |            | 2033 | EP300   |                              | 1 |    |   |          |
|   |            | 2045 | EPHA7   |                              | 1 |    |   |          |
| 6 | Module 6-1 | 5781 | PTPN11  | /                            | 3 | 4  | 4 | 9.72E-07 |
|   |            | 3710 | ITPR3   |                              | 1 |    |   |          |
|   |            | 2321 | FLT1    |                              | 1 |    |   |          |
|   | Module 6-2 | 2967 | GTF2H3  | /                            | 2 | 4  |   |          |
|   |            | 8805 | TRIM24  |                              | 1 |    |   |          |
|   |            | 6882 | TAF11   |                              | 1 |    |   |          |
| 7 | Module 7-1 | 5781 | PTPN11  | RTK<br>signaling<br>pathway  | 3 | 8  | 8 | 2.03E-06 |
|   |            | 2064 | ERBB2   |                              | 2 |    |   |          |
|   |            | 3667 | IRS1    |                              | 1 |    |   |          |
|   |            | 8826 | IQGAP1  |                              | 1 |    |   |          |
|   |            | 7465 | WEE1    |                              | 1 |    |   |          |
|   | Module 7-2 | 3845 | KRAS    | RTK<br>signaling<br>pathway  | 3 | 17 |   |          |
|   |            | 4763 | NF1     |                              | 9 |    |   |          |
|   |            | 5290 | PIK3CA  |                              | 5 |    |   |          |

Note:

<sup>1</sup>Gene symbols marked in blue indicate that the gene is annotated in the GBM signaling pathway (column “Pathway”) identified by the original TCGA analysis.

<sup>2</sup>#N denotes the number of glioblastoma samples that contain alterations of the individual genes in the module.

<sup>3</sup>#M denotes the number of glioblastoma samples that contain the alterations of the Module.

<sup>4</sup>#S denotes the number of glioblastoma samples that contain the alterations from both modules.

**Supplementary Table 2- Candidate driver genes of GBM**

| Entrez<br>Gene ID | Gene symbol | Sample <sup>#</sup> | Cancer <sup>*</sup> | GBM <sup>**</sup> | F-census <sup>§</sup> | Core pathway <sup>&amp;</sup> |
|-------------------|-------------|---------------------|---------------------|-------------------|-----------------------|-------------------------------|
| 506               | ATP5B       | 2                   | 22                  | 1                 | No                    | No                            |
| 920               | CD4         | 2                   | 18330               | 65                | No                    | No                            |
| 1017              | CDK2        | 2                   | 2515                | 6                 | Yes                   | No                            |
| 1027              | CDKN1B      | 2                   | 3325                | 11                | Yes                   | No                            |
| 1029              | CDKN2A      | 27                  | 7141                | 60                | Yes                   | Yes                           |
| 1431              | CS          | 2                   | 21557               | 36                | No                    | No                            |
| 1432              | MAPK14      | 1                   | 76                  | 2                 | Yes                   | No                            |
| 1608              | DGKG        | 1                   | 1                   | 0                 | No                    | No                            |
| 1956              | EGFR        | 34                  | 13379               | 273               | Yes                   | Yes                           |
| 2033              | EP300       | 1                   | 200                 | 2                 | Yes                   | No                            |
| 2045              | EPHA7       | 1                   | 29                  | 1                 | Yes                   | No                            |
| 2064              | ERBB2       | 2                   | 14558               | 16                | Yes                   | Yes                           |
| 2260              | FGFR1       | 1                   | 590                 | 5                 | Yes                   | No                            |
| 2321              | FLT1        | 1                   | 204                 | 1                 | Yes                   | No                            |
| 2967              | GTF2H3      | 2                   | 1                   | 0                 | No                    | No                            |
| 3118              | HLA-DQA2    | 1                   | 0                   | 0                 | No                    | No                            |
| 3122              | HLA-DRA     | 2                   | 121                 | 0                 | No                    | No                            |
| 3320              | HSP90AA1    | 1                   | 6                   | 1                 | Yes                   | No                            |
| 3458              | IFNG        | 2                   | 83                  | 1                 | Yes                   | No                            |
| 3667              | IRS1        | 1                   | 434                 | 1                 | No                    | No                            |
| 3710              | ITPR3       | 1                   | 2                   | 0                 | No                    | No                            |
| 3845              | KRAS        | 3                   | 2514                | 5                 | Yes                   | Yes                           |
| 4194              | MDM4        | 5                   | 168                 | 5                 | Yes                   | Yes                           |
| 4507              | MTAP        | 1                   | 136                 | 1                 | Yes                   | No                            |
| 4763              | NF1         | 9                   | 2155                | 8                 | Yes                   | Yes                           |
| 5037              | PEBP1       | 2                   | 94                  | 0                 | Yes                   | No                            |
| 5156              | PDGFRA      | 10                  | 1565                | 19                | Yes                   | Yes                           |
| 5287              | PIK3C2B     | 4                   | 14                  | 2                 | No                    | No                            |
| 5290              | PIK3CA      | 5                   | 781                 | 3                 | Yes                   | Yes                           |
| 5295              | PIK3R1      | 5                   | 41                  | 2                 | Yes                   | Yes                           |
| 5580              | PRKCD       | 1                   | 231                 | 0                 | Yes                   | No                            |
| 5728              | PTEN        | 22                  | 4542                | 129               | Yes                   | Yes                           |
| 5781              | PTPN11      | 3                   | 515                 | 2                 | Yes                   | No                            |
| 5925              | RB1         | 8                   | 1163                | 5                 | Yes                   | Yes                           |
| 6197              | RPS6KA3     | 1                   | 0                   | 0                 | Yes                   | No                            |
| 6872              | TAF1        | 2                   | 21                  | 0                 | Yes                   | No                            |
| 6882              | TAF11       | 1                   | 1                   | 1                 | No                    | No                            |
| 7157              | TP53        | 22                  | 5123                | 58                | Yes                   | Yes                           |
| 7465              | WEE1        | 1                   | 195                 | 0                 | Yes                   | No                            |

|        |        |    |    |   |     |    |
|--------|--------|----|----|---|-----|----|
| 8805   | TRIM24 | 1  | 13 | 0 | Yes | No |
| 8826   | IQGAP1 | 1  | 85 | 1 | No  | No |
| 116986 | AGAP2  | 14 | 18 | 1 | Yes | No |

Note:

<sup>#</sup>Sample indicates the number of samples harboring alterations in the gene.

<sup>\*</sup>Cancer indicates the number of times the altered gene co-appeared with the term “cancer” in the articles from PubMed.

<sup>\*\*</sup>GBM indicates the number of times the altered gene co-appeared with the term “GBM” in the articles from PubMed.

<sup>§</sup>If the altered gene is recorded in the cancer gene database “F-census”, it is marked with “Yes”; otherwise, it is marked with “No”.

<sup>&</sup> Core pathway indicates the three critical GBM pathways analyzed in the original TCGA GBM study. If the altered gene appears in any of the three pathways, it is marked with “Yes”; otherwise, it is marked with “No”.

**Supplementary Table 3- Literature evidence for candidate cancer driver genes**

| Gene Symbol | Description from papers                                                                                                                                                                                                                                                                                                                                      | PMID*                                                                                                                                                   |
|-------------|--------------------------------------------------------------------------------------------------------------------------------------------------------------------------------------------------------------------------------------------------------------------------------------------------------------------------------------------------------------|---------------------------------------------------------------------------------------------------------------------------------------------------------|
| ATP5B       | ATP5B co-regulated with ANT1 in glioblastoma.                                                                                                                                                                                                                                                                                                                | <a href="#">22978616</a>                                                                                                                                |
| CD4         | It has been reported that CD4 may function as an important mediator of immune-mediated diseases of the central nervous system, and CD4 <sup>+</sup> T cells were required for GBM regression and immunological memory                                                                                                                                        | <a href="#">19143470/18490770/2872572/22485134/16631933/8592229</a>                                                                                     |
| CDK2        | Assessment of gene expression in TCGA-derived GBMs revealed overexpression of MRC cancer genes AURKB, BIRC5, CCNB1, CCNB2, CDC2, CDK2, and FOXM1, which form a transcriptional network important for G2/M progression and/or checkpoint activation.                                                                                                          | <a href="#">19139420/21807073/17289901/15531918</a>                                                                                                     |
| CDKN1B      | CDKN1B decreased with anaplasia and almost disappeared in glioblastomas.                                                                                                                                                                                                                                                                                     | <a href="#">12133571/16805985</a>                                                                                                                       |
| CDKN2A      | The most common homozygously deleted region contained CDKN2A/CDKN2B (p15 and p16) occurring in 29% of GBM cases. The CDKN2A/CDKN2B locus was deleted in 46.4% of the combined cases.                                                                                                                                                                         | <a href="#">20212223/22736234/22711607/22086906/22046342/21987724/21713760/21472719/20822523/18981259/17465990/17121137</a>                             |
| CS          | RA, together with Cs, Cl and CP, might be the new leaders in the evaluation of brain tumors.                                                                                                                                                                                                                                                                 | <a href="#">23085868</a>                                                                                                                                |
| MAPK14      | The upregulation of PTEN gene was correlated with the downregulation of numerous genes including Akt, JUN, MAPK14 in glioma cells.                                                                                                                                                                                                                           | <a href="#">20436671/22185703/21663587</a>                                                                                                              |
| DGKG        | /                                                                                                                                                                                                                                                                                                                                                            | /                                                                                                                                                       |
| EGFR        | Our experiments found that miR-34a was often deleted and epidermal growth factor receptor (EGFR) was frequently amplified in genomic DNA of 55 GBMs using single-nucleotide polymorphism DNA microarray. Notably, we found that the mean survival time was significantly shortened for patients whose GBMs had both EGFR amplification and miR-34a deletion. | <a href="#">22580610/23043252/23029035/23012408/222930388/22737970/22736234/22588883/22472960/22348136/22323597/22232519/22162832/22089350/21975932</a> |
| EP300       | The gene EP300 is a driver in GBM, which could predict survival for patients with GBM.                                                                                                                                                                                                                                                                       | <a href="#">21489305/21807073/21304179</a>                                                                                                              |
| EPHA7       | Overexpression of EPHA7 protein was predictive of the adverse outcome in GBM patients, independent of MVD expression. Moreover, high density of MVD as well as higher EphA7 expression predicted the disease outcome more accurately than EphA7 variable alone                                                                                               | <a href="#">18366728</a>                                                                                                                                |
| ERBB2       | Compensatory activation of related ERBB family                                                                                                                                                                                                                                                                                                               | <a href="#">22745588/21827413/</a>                                                                                                                      |



|          |                                                                                                                                                                                                                                                                                                                                                                                                                                                                                                                                                               |                                                                                 |
|----------|---------------------------------------------------------------------------------------------------------------------------------------------------------------------------------------------------------------------------------------------------------------------------------------------------------------------------------------------------------------------------------------------------------------------------------------------------------------------------------------------------------------------------------------------------------------|---------------------------------------------------------------------------------|
|          | receptors (ERBB2 and ERBB3) was observed in GBM CSCs deprived of EGFR signal. Dual inhibition of EGFR and ERBB2 with lapatinib significantly reduced GBM proliferation in colony formation assays compared to cetuximab-mediated EGFR-specific inhibition.                                                                                                                                                                                                                                                                                                    | 19793689/17571214/17536308/17457042/15256472/14965445/12902879/12532415/7760096 |
| FGFR1    | Studied key genes through GO-analysis, pathway-analysis and in the Me-CCNU-related signal transduction networks, 25 core genes that influenced chemosensitivity of GBM to Me-CCNU were obtained, including TP53, FGFR1, MAP2K2, EP300, PRKCA, CCND1, AKT2, RBL1, RAF1, CDKN2C and so on.                                                                                                                                                                                                                                                                      | <a href="#">21807073/22837387/19340397</a>                                      |
| FLT1     | A prerequisite for tumor angiogenesis, besides the expression of the angiogenic VEGF by tumor and stromal cells, is the expression of the VEGF receptors FLT-1 and KDR in rat C6 glioblastoma cells.                                                                                                                                                                                                                                                                                                                                                          | <a href="#">9393770</a>                                                         |
| GTF2H3   | /                                                                                                                                                                                                                                                                                                                                                                                                                                                                                                                                                             | /                                                                               |
| HLA-DQA2 | /                                                                                                                                                                                                                                                                                                                                                                                                                                                                                                                                                             | /                                                                               |
| HLA-DRA  | /                                                                                                                                                                                                                                                                                                                                                                                                                                                                                                                                                             | /                                                                               |
| HSP90AA1 | We investigated protein expression between the four regions of glioblastoma on clinically relevant biopsies from 5 patients. We identified 584 non-redundant proteins and 31 proteins were found to be up-regulated in the tumor region compared to the peri-tumoral brain tissue, among which, 24 proteins belong to an interaction network linked to 4 biological processes. The core of this network is mainly constituted of interactions between beta-actin (ACTB) with heat shock proteins (HSP90AA1, HSPA8) and 14-3-3 proteins (YWHAZ, YWHAG, YWHAB). | <a href="#">22575386/22952576</a>                                               |
| IFNG     | ATRA plus IFN- $\gamma$ could significantly decrease cell viability and increase morphological features of apoptosis in glioblastoma cells lines.                                                                                                                                                                                                                                                                                                                                                                                                             | <a href="#">17960384/22185703</a>                                               |
| IRS1     | For glioblastoma, we identified alterations of critical genes in the TP53 pathway (TP53, MDM2, and MDM4), the RB1 pathway (RB1, CDK4, and CDKN2A), and the PI3K/PTEN pathway (PIK3CA, PIK3R1, PTEN, and IRS1).                                                                                                                                                                                                                                                                                                                                                | <a href="#">18772396</a>                                                        |
| ITPR3    | /                                                                                                                                                                                                                                                                                                                                                                                                                                                                                                                                                             | /                                                                               |
| KRAS     | We show here that Ink4a-Arf deficiency allows for GBM formation from astrocytes and that it enhances tumor incidence in neural progenitor cells. Furthermore, KRAS alone can cooperate with deletion of the Ink4a-Arf locus in tumor formation from both neural                                                                                                                                                                                                                                                                                               | <a href="#">12359767/21949886</a>                                               |

|         |                                                                                                                                                                                                                                                                                                                                                       |                                                                                                                                                        |
|---------|-------------------------------------------------------------------------------------------------------------------------------------------------------------------------------------------------------------------------------------------------------------------------------------------------------------------------------------------------------|--------------------------------------------------------------------------------------------------------------------------------------------------------|
|         | progenitor cells and astrocytes.                                                                                                                                                                                                                                                                                                                      |                                                                                                                                                        |
| MDM4    | Illumina Bead Arrays were used to assay 22 GBMs and Digital Karyotyping was used on 8 GBM cell lines and one primary sample. The common amplifications we observed for all 31 samples was GLI/CDK4 (22.6%), MDM2 (12.9%) and PIK3C2B/MDM4 (12.9%).                                                                                                    | <a href="#">19609742/21807073/16319692</a>                                                                                                             |
| MTAP    | This finding suggests that all three genes (CDKN2A/p16, CDKN2B/p15, and MTAP) may be inactivated in glioblastomas by a large deletion event.                                                                                                                                                                                                          | <a href="#">21884817</a>                                                                                                                               |
| NF1     | Humans with mutations in NF1 develop neurofibromatosis type I (NF1) and have increased risk of optic gliomas, astrocytomas and glioblastomas                                                                                                                                                                                                          | <a href="#">10973261/23045694/2539962/22086906/21889780/20442305/20129251/19915670/18975243</a>                                                        |
| PEBP1   | /                                                                                                                                                                                                                                                                                                                                                     | /                                                                                                                                                      |
| PDGFRA  | Using primary GBM cells maintained under neurosphere conditions, we then demonstrated that miR-34a specifically affects growth of proneural glioma cells in vitro and in vivo. Further bioinformatic analysis identified PDGFRA as a direct target of miR-34a and this interaction was experimentally validated.                                      | <a href="#">22479456/23029035/22747609/22661320/22661233/22323597/21880180/22086906/20129251/19915670/19609742/18816605/19967449/17504929/17002787</a> |
| PIK3C2B | PIK3C2B has a crucial role in the PI3K signaling pathway involved in the regulation of cell proliferation in GBM patients                                                                                                                                                                                                                             | <a href="#">21861842</a><br><a href="#">/19189657/19609742</a>                                                                                         |
| PIK3CA  | The highest frequencies of gains were detected on PIK3CA (64.3%), EGFR (57.1%), CSE1L (57.1%), NRAS (50%), MYCN (42.9%), FGR (35.7%), ESR (35.7%), PGY1 (35.7%), and D17S167 (35.7%). These genes are suggested to be involved in the GBM tumorigenesis.                                                                                              | <a href="#">11351043/22930388/2064833/22026810</a>                                                                                                     |
| PIK3R1  | We mapped alterations in each of these pathways and found that they included the catalytic PIK3CA and regulatory PIK3R1 subunit genes of the class IA PI3K. Knockdown of either of these genes separately in GBM cell lines by lentiviral-mediated shRNA expression resulted in decreased proliferation, migration, and invasion in all lines tested. | <a href="#">22064833/21663587</a>                                                                                                                      |
| PRKCD   | /                                                                                                                                                                                                                                                                                                                                                     | /                                                                                                                                                      |
| PTEN    | PTEN appears to be the major target of inactivation on chromosome 10q in glioblastoma multiforme.                                                                                                                                                                                                                                                     | <a href="#">9331071/22479427/20736378/20462843/19150964/19276385</a>                                                                                   |

|         |                                                                                                                                                                                                                                                                                                                                                            |                                                                                                                            |
|---------|------------------------------------------------------------------------------------------------------------------------------------------------------------------------------------------------------------------------------------------------------------------------------------------------------------------------------------------------------------|----------------------------------------------------------------------------------------------------------------------------|
| PTPN11  | Inhibition of SHP-2 expression by Shp-2 siRNA inhibited cell growth, transformation and altered morphology of these EGFRvIII transformed GBM cells.                                                                                                                                                                                                        | <a href="#">19427850/21934682</a>                                                                                          |
| RB1     | We found that abnormalities in any of the four genes (CDKN2A, CDKN2B, RB1, and CDK4) coding for components of the Rb1 pathway were associated with shorter survival in glioblastomas patients.                                                                                                                                                             | <a href="#">14519639/18816605/2157621/21555372</a>                                                                         |
| RPS6KA3 | /                                                                                                                                                                                                                                                                                                                                                          | /                                                                                                                          |
| TAF1    | /                                                                                                                                                                                                                                                                                                                                                          | /                                                                                                                          |
| TAF11   | TAF11 was overexpressed in glioblastomas relative to non-neoplastic brain tissue as indicated by microarray analysis                                                                                                                                                                                                                                       | <a href="#">18398573</a>                                                                                                   |
| TP53    | TP53 mutations were found in 12 out of 54 (22%) GBMs of short-term survivors and 8 out of 35 (23%) tumors of long-term survivors.                                                                                                                                                                                                                          | <a href="#">11519857/22661320/23034333/22886134/2287028/21528672/21483692/20593219/18948956/18383819/11083071/12622447</a> |
| WEE1    | We analyze the kinase gene expression profiles of various tumor types and reveal the WEE1 kinase to be overexpressed in glioblastomas. We demonstrate that WEE1 is a major regulator of the G2 checkpoint in glioblastoma cells. Our results suggest that inhibition of WEE1 kinase holds potential as a therapeutic approach in treatment of glioblastoma | <a href="#">20832752</a>                                                                                                   |
| TRIM24  | /                                                                                                                                                                                                                                                                                                                                                          | /                                                                                                                          |
| IQGAP1  | We confirmed that IQGAP1 is a reliable marker that may help to distinguish oligodendroglioma from glioblastoma. Although in both tumors IQGAP1 is expressed by endothelial cells, only in glioblastoma it specifies a population of amplifying tumor cells.                                                                                                | <a href="#">16982749/21196113</a>                                                                                          |
| AGAP2   | We also identify new candidate drivers in GBM, including AGAP2/CENTG1, a putative oncogene and an activator of the PI3K pathway;                                                                                                                                                                                                                           | <a href="#">20169195</a>                                                                                                   |

Note:

\* The column of PMID lists some of the PubMed IDs of papers supporting that the candidate driver genes may play roles in carcinogenesis of glioblastomas (GBM). The PubMed ID marked with blue color denotes that the detailed description in this paper is provided in the second column.
